# Supplementary material
Source: Springer Nature journal article supplement (https://www.springermedizin.de/resource/supplementary/12889_2013_5726_MOESM2_ESM.pdf/9496114)
Supplement: MOESM2 [file 9496114]

Additional file 2

Table S2 Characteristics for the total group at 18 months and those participating at three time points

| <b>Dietary behaviours and maternal education</b> | <b>18 months</b>  |             |                              |             |
|--------------------------------------------------|-------------------|-------------|------------------------------|-------------|
|                                                  | Total (n = 57783) |             | Three time points (n = 9025) |             |
|                                                  | n                 | %           | n                            | %           |
| <b>Fruit (times/week)</b>                        | 56674             |             | 8926                         |             |
| Low ( $\leq 5$ )                                 | 17513             | <b>30.9</b> | 3353                         | <b>37.6</b> |
| Medium (5.1-13.9)                                | 34428             | <b>60.7</b> | 5002                         | <b>56.0</b> |
| High ( $\geq 14$ )                               | 4733              | <b>8.4</b>  | 571                          | <b>6.4</b>  |
| <b>Vegetables (times/week)</b>                   | 57263             |             | 8983                         |             |
| Low ( $\leq 5$ )                                 | 21634             | <b>37.8</b> | 3545                         | <b>39.5</b> |
| Medium (5.1-7)                                   | 12820             | <b>22.4</b> | 2126                         | <b>23.7</b> |
| High ( $> 7$ )                                   | 22809             | <b>39.8</b> | 3312                         | <b>36.9</b> |
| <b>SSB (times or glasses/week)</b>               | 55540             |             | 8771                         |             |
| Low ( $\leq 1.5$ )                               | 34630             | <b>62.4</b> | 4357                         | <b>49.7</b> |
| Medium (1.6-4.9)                                 | 11931             | <b>21.5</b> | 2309                         | <b>26.3</b> |
| High ( $\geq 5$ )                                | 8979              | <b>16.2</b> | 2105                         | <b>24.0</b> |
| <b>Maternal education</b>                        | 54990             |             | 8686                         |             |
| Low ( $\leq 12$ years)                           | 16689             | <b>30.3</b> | 2967                         | <b>34.2</b> |
| Medium (13-16 years)                             | 23862             | <b>43.4</b> | 3985                         | <b>45.9</b> |
| High ( $\geq 17$ years)                          | 14439             | <b>26.3</b> | 1734                         | <b>20.0</b> |

SSB: Sugar-sweetened beverages

All differences between the total sample and those participating at three time points are significant  $P < .001$
